# Supplementary material
Source: Elsevier journal article supplement (https://www.sciencedirect.com/science/article/pii/S0213911119302304)
Supplement: mmc1 [file S0213911119302304:mmc1.docx]

**Apéndice**

**Tabla I**

Experiencia de violenciaa de pareja en las mujeres de la Cohorte de Trabajadores de la Salud: mediciones de 2004 y 2011

| **Características** | **2004 (n = 470)** | |  | **2011 (n = 470)** | |
| --- | --- | --- | --- | --- | --- |
|  | **n** | **%** |  | **n** | **%** |
| *Cualquier tipo de violencia de pareja* |  |  |  |  |  |
| No | 273 | 58,1 |  | 284 | 60,4 |
| Sí | 197 | 41,9 |  | 186 | 39,6 |
|  |  |  |  |  |  |
| *Tipo de violencia de parejab* |  |  |  |  |  |
| Ninguna | 273 | 58,0 |  | 284 | 60,4 |
| Física | 87 | 18,5 |  | 76 | 16,2 |
| Verbal/psicológica y sexual | 110 | 23,4 |  | 110 | 23,4 |
|  |  |  |  |  |  |
| Ninguna | 273 | 58,0 |  | 284 | 60,4 |
| Verbal/psicológica | 176 | 37,5 |  | 167 | 35,5 |
| Física y sexual | 21 | 4,5 |  | 19 | 4,0 |
|  |  |  |  |  |  |
| Ninguna | 273 | 58,0 |  | 284 | 60,4 |
| Sexual | 56 | 11,9 |  | 62 | 13,2 |
| Física y verbal/psicológica | 141 | 30,0 |  | 124 | 26,4 |
|  |  |  |  |  |  |
| *Intensidad de la violencia de parejac* |  |  |  |  |  |
| Sin violencia | 273 | 58,0 |  | 284 | 60,4 |
| Baja | 80 | 17,1 |  | 55 | 11,7 |
| Moderada | 78 | 16,6 |  | 80 | 17,0 |
| Alto | 39 | 8,3 |  | 51 | 10,9 |
|  |  |  |  |  |  |

aAutorreporte de algún tipo de violencia de pareja en los últimos 12 meses.

bLas categorías no son mutuamente excluyentes debido a que la mayoría reportó más de un tipo de violencia de pareja; los porcentajes se estimaron para la totalidad de la muestra.

cIntensidad de la violencia: baja, quienes reportaron «una vez»; moderada, quienes reportaron «varias veces»; alta, quienes reportaron «muchas veces» a cualquiera de las 26 conductas violentas por parte de la pareja.

**Tabla II**

Experiencia de violenciaa de pareja y riesgo de diagnóstico de depresiónb en mujeres de la Cohorte de Trabajadores de la Salud (n = 470)

|  | **OR cruda** | **(IC95%)** | **OR ajustadac** | **(IC95%)** |
| --- | --- | --- | --- | --- |
| *Cualquier tipo de violencia de pareja* |  |  |  |  |
| No | 1,0 |  | 1,0 |  |
| Sí | 1,4 | (0,7-2,9) | 1,6 | (0,8-3,3) |
| *Tipo de violencia de parejad* |  |  |  |  |
| Física | 1,1 | (0,6-1,8) | 1,8 | (1,2-2,8) |
| Verbal/psicológica | 1,4 | (1,0-1,9) | 1,5 | (1,1-2,0) |
| Sexual | 1,1 | (0,6-1,8) | 1,5 | (1,0-2,2) |
|  |  |  |  |  |
| *Cualquier tipo de violencia de pareja* |  |  |  |  |
| Ninguna | 1,0 |  | 1,0 |  |
| 2004 o 2011 | 1,5 | (0,6-3,6) | 1,4 | (0,6-3,6) |
| 2004 y 2011 | 2,6 | (1,1-6,0) | 3,4 | (1,4-8,2) |

IC95%: intervalo de confianza del 95%.

aAutorreporte de cualquier tipo de violencia de pareja los últimos 12 meses en la medición de 2004.

bAutorreporte de diagnóstico médico de depresión en la medición de 2011.

cAjustada por edad, escolaridad, estado civil, índice de masa corporal y actividad física.

dModelos individuales evaluando el efecto del tipo de violencia en comparación con ningún tipo de violencia de pareja (violencia física *versus* ningún tipo de violencia de pareja excluyendo quienes reportaron otros tipos de violencia diferentes de la física).
